# Supplementary material for: HPLC-FLD determination of aflatoxins M1 and M2 in raw cow milk samples using in-syringe gas-controlled density tunable solidification of a floating organic droplet-based dispersive liquid–liquid microextraction method
Source: Royal Society of Chemistry journal article supplement (doi:10.1039/d3ra04149b), 2024-01-01
Supplement: d3ra04149b1.pdf [file d3ra04149b1.pdf]

### Supplementary data

#### **HPLC–FLD determination of aflatoxins M<sub>1</sub> and M<sub>2</sub> in raw cow milk samples using in–syringe gas–controlled density tunable solidification of floating organic droplet–based dispersive liquid–liquid microextraction method**

Maede Rabie<sup>1</sup>, Mohammadhosein Movassaghghazani<sup>2,\*</sup>, Mohammad Reza Afshar Mogaddam<sup>3,4</sup>

<sup>1</sup> Faculty of Veterinary Medicine, Shabestar Branch, Islamic Azad University, Shabestar, Iran

<sup>2</sup> Department of Food Hygiene and Quality Control, Faculty of Veterinary Medicine, Shabestar Branch, Islamic Azad University, Shabestar, Iran

<sup>3</sup> Food and Drug Safety Research Center, Tabriz University of Medical Sciences, Tabriz, Iran

<sup>4</sup>Pharmaceutical Analysis Research Center, Tabriz University of Medical Sciences, Tabriz, Iran

Corresponding author: Dr. M. Movassaghghazani

Email: mh.movassagh@iau.ac.ir; drmhmg@gmail.com

Phone: +989143010292

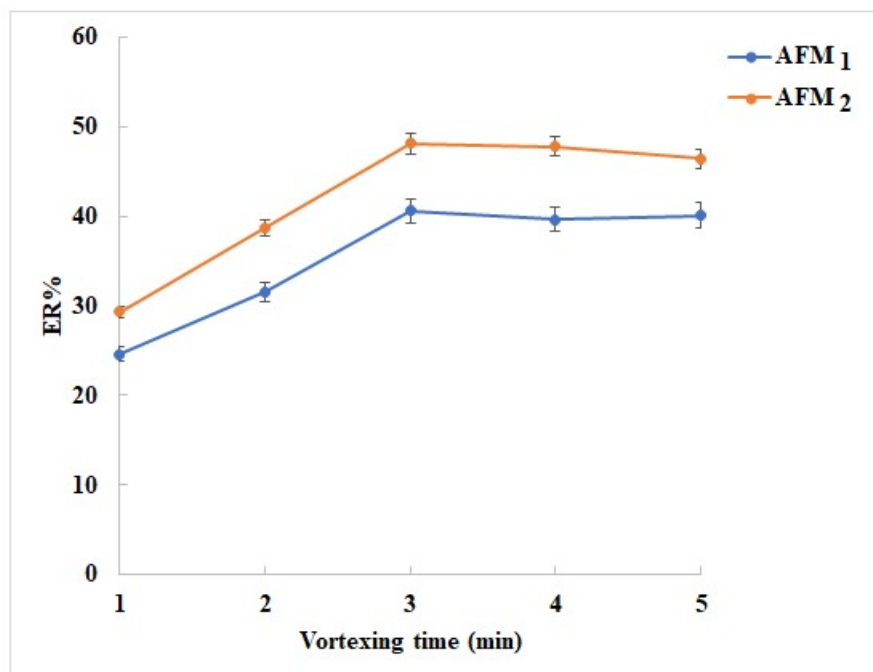

Fig. S1. Optimization of vortexing time

Conditions: sample, 5 mL blank raw cow milk sample spiked with 200 ng L<sup>-1</sup> of each analyte; zinc sulfate solution concentration (volume), 25% w/v (1 mL); centrifuging speed (time), 5000 rpm (5 min); extraction solvent (volume), ChCl: phenylacetic acid DES (80 µL); density modifier (volume), dichloromethane (175 µL); inert gas type (flow rate), nitrogen (25 mL min<sup>-1</sup>). The error bars show the minimum and maximum of three repeated determinations.
